# Supplementary material for: Circular RNA circGSE1 promotes angiogenesis in ageing mice by targeting the miR-323-5p/NRP1 axis
Source: publisher site journal article supplement (doi:10.18632/aging.203988), 2022-04-01
Supplement: Supplementary file [file aging-v14i7-203988-supplementary-material-SD1.pdf]

## SUPPLEMENTARY TABLES

**Supplementary Table 1. Primers used in this study.**

| Name         | Primer           | Sequence(5'-3')                                    |
|--------------|------------------|----------------------------------------------------|
| CircGSE1     | Forward primer   | CGCAAGCTCGCCAAACAG                                 |
|              | Reverse primer   | GCCGTGGAAAGCATCCCTAT                               |
| Linear GSE1  | Forward primer   | ATGCTTTCACGGCGACC                                  |
|              | Reverse primer   | TGGGCTCCTCTGCCTGTTT                                |
| GAPDH        | Forward primer   | CAATGACCCCTTCATTGACC                               |
|              | Reverse primer   | TTGATTTTGGAGGGATCTCG                               |
| NRP1         | Forward primer   | GACAAATGTGGCGGGACCATA                              |
|              | Reverse primer   | TGGATTAGCCATTCACACTTCTC                            |
| miR323-5p    | Stem-loop primer | GTCGTATCCAGTGCAGGGTCCGAGGTATTCGCACTGGATACGACGCGAAC |
|              | Forward primer   | AGGTGGTCCGTGGCGC                                   |
| miR320-3P    | Reverse primer   | AGTGCAGGGTCCGAGGTATT                               |
|              | Stem-loop primer | GTCGTATCCAGTGCAGGGTCCGAGGTATTCGCACTGGATACGACTCGCCC |
|              | Forward primer   | GCGAAAAGCTGGGTTGAGA                                |
| miR6769b-5P  | Reverse primer   | AGTGCAGGGTCCGAGGTATT                               |
|              | Stem-loop primer | GTCGTATCCAGTGCAGGGTCCGAGGTATTCGCACTGGATACGACGCTCTT |
|              | Forward primer   | CGCCTGGTGGGTGGGG                                   |
| miR-6917-5P  | Reverse primer   | AGTGCAGGGTCCGAGGTATT                               |
|              | Stem-loop primer | GTCGTATCCAGTGCAGGGTCCGAGGTATTCGCACTGGATACGACCGGCAC |
|              | Forward primer   | CGCGTGTGGAAGGGGAGTT                                |
| miR-6924-5P  | Reverse primer   | AGTGCAGGGTCCGAGGTATT                               |
|              | Stem-loop primer | GTCGTATCCAGTGCAGGGTCCGAGGTATTCGCACTGGATACGACTTCCG  |
|              | Forward primer   | CGAGAGGATGGGGATTTGG                                |
| miR-6943-5P  | Reverse primer   | AGTGCAGGGTCCGAGGTATT                               |
|              | Stem-loop primer | GTCGTATCCAGTGCAGGGTCCGAGGTATTCGCACTGGATACGACTAGCTT |
|              | Forward primer   | GCGTGGGGTGAGGTTGG                                  |
| miR-6973a-5P | Reverse primer   | AGTGCAGGGTCCGAGGTATT                               |
|              | Stem-loop primer | GTCGTATCCAGTGCAGGGTCCGAGGTATTCGCACTGGATACGACCAACTC |
|              | Forward primer   | CGTACGGTGGGAGGGGTG                                 |
| miR-7036b-3p | Reverse primer   | AGTGCAGGGTCCGAGGTATT                               |
|              | Stem-loop primer | GTCGTATCCAGTGCAGGGTCCGAGGTATTCGCACTGGATACGACGGACCC |
|              | Forward primer   | GTTCCCTGGTGGGCCTCG                                 |
| U6           | Reverse primer   | AGTGCAGGGTCCGAGGTATT                               |
|              | Stem-loop primer | CTCAACTGGTGTCTGGAGTCGGCAATTCAGTTGAGAAAAATAT        |
| U6           | Forward primer   | CAAGGATGACACGCAA                                   |
|              | Reverse primer   | TCAACTGGTGTCTGG                                    |

**Supplementary Table 2. Oligonucleotides and probes used in this study.**

| <b>Definition</b>             | <b>Sequence(5'-3')</b>                                             |
|-------------------------------|--------------------------------------------------------------------|
| si-circGSE1-1                 | Sense: AGCCAGAGGCAUGAGCCA<br>Antisense: UGGCUCAUGCCUCUGGGCU        |
| si-circGSE1-2                 | Sense: CCAGAGGCAUGAGCCAUGA<br>Antisense: UCAUGGCUCAUGCCUCUGG       |
| si-circGSE1-3                 | Sense: CAGAGGCAUGAGCCAUGAG<br>Antisense: CUCAUGGCUCAUGCCUCUG       |
| si-NRP1-1                     | Sense: GGGUGCCAUUCCAAGGAA<br>Antisense: CCCUCGGUAAAGGUUCCUU        |
| si-NRP1-2                     | Sense: GCUGCAAGAUACAGAUUA<br>Antisense: CGACGUUCUAUUGUCUAAT        |
| si-NRP1-3                     | Sense: CCAAGUGAGAAGUGUGAAU<br>Antisense: GGUUCACUCUUCACACUUA       |
| miR323-5p mimic               | Sense: AGGUGGUCCGUGGCGCGUUCGC<br>Antisense: GCGAACGCGCCACGGACCACCU |
| miR323-5p inhibitor           | GCGAACGCGCCACGGACCACCU                                             |
| Cy3-labeled circGSE1 probe    | CTCATGCCTCTGGGCTCCTCT                                              |
| FITC-labeled miR-323-5p probe | CGAACGCGCCACGGACCACCT                                              |

**Supplementary Table 3. Primary antibodies for western blot and Immunohistochemistry.**

| <b>Antibody</b>             | <b>Company/catalog number</b>    |
|-----------------------------|----------------------------------|
| NRP1 (western blot)         | Cell Signaling Technology, #3725 |
| NRP1 (Immunohistochemistry) | Abcam,ab81321                    |
| CD31(Immunohistochemistry)  | Abcam,ab28364                    |
